# Supplementary material
Source: MDPI journal article supplement (https://www.mdpi.com/2304-6740/4/2/16)

# checkCIF/PLATON report

You have not supplied any structure factors. As a result the full set of tests cannot be run.

THIS REPORT IS FOR GUIDANCE ONLY. IF USED AS PART OF A REVIEW PROCEDURE FOR PUBLICATION, IT SHOULD NOT REPLACE THE EXPERTISE OF AN EXPERIENCED CRYSTALLOGRAPHIC REFEREE.

No syntax errors found.      CIF dictionary      Interpreting this report

## Datablock: 56\_11\_1

---

Bond precision:    O- O = 0.0400 A                      Wavelength=0.71075

Cell:                      a=23.525(5)              b=32.926(7)              c=25.424(6)  
                            alpha=90              beta=93.273(2)              gamma=90  
Temperature:              150 K

|                | Calculated                                | Reported                 |
|----------------|-------------------------------------------|--------------------------|
| Volume         | 19661(8)                                  | 19661(7)                 |
| Space group    | P 21/a                                    | P 21/a                   |
| Hall group     | -P 2yab                                   | ?                        |
| Moiety formula | 2(In10 O157 Si4 W36), O4,<br>68(O), 23(K) | ?                        |
| Sum formula    | In20 K23 O386 Si8 W72                     | In10 K11.50 O193 Si4 W36 |
| Mr             | 22832.88                                  | 11416.81                 |
| Dx,g cm-3      | 3.857                                     | 3.857                    |
| Z              | 2                                         | 4                        |
| Mu (mm-1)      | 22.491                                    | 22.491                   |
| F000           | 19890.0                                   | 19890.0                  |
| F000'          | 19778.10                                  |                          |
| h,k,lmax       | 30,42,33                                  | 30,42,33                 |
| Nref           | 45058                                     | 44125                    |
| Tmin,Tmax      | 0.216,0.325                               | 0.660,1.000              |
| Tmin'          | 0.008                                     |                          |

Correction method= # Reported T Limits: Tmin=0.660 Tmax=1.000  
AbsCorr = MULTI-SCAN

Data completeness= 0.979                      Theta(max)= 27.480

R(reflections)= 0.0829( 34297)              wR2(reflections)= 0.2295( 44125)

S = 1.056                      Npar= 2113

---

The following ALERTS were generated. Each ALERT has the format

**test-name\_ALERT\_alert-type\_alert-level.**

Click on the hyperlinks for more details of the test.

---

### Alert level A

|                                                                      |                             |             |
|----------------------------------------------------------------------|-----------------------------|-------------|
| PLAT213_ALERT_2_A Atom O47                                           | has ADP max/min Ratio ..... | 8.7 prolat  |
| PLAT213_ALERT_2_A Atom O48                                           | has ADP max/min Ratio ..... | 5.6 prolat  |
| PLAT213_ALERT_2_A Atom O54                                           | has ADP max/min Ratio ..... | 6.6 prolat  |
| PLAT213_ALERT_2_A Atom O55                                           | has ADP max/min Ratio ..... | 7.9 prolat  |
| PLAT213_ALERT_2_A Atom O58                                           | has ADP max/min Ratio ..... | 10.4 prolat |
| PLAT213_ALERT_2_A Atom O139                                          | has ADP max/min Ratio ..... | 11.5 prolat |
| PLAT602_ALERT_2_A VERY LARGE Solvent Accessible VOID(S) in Structure |                             | ! Info      |

---

### Alert level B

DIFMN02\_ALERT\_2\_B The minimum difference density is < -0.1\*ZMAX\*1.00

\_refine\_diff\_density\_min given = -8.740

Test value = -7.400

DIFMX01\_ALERT\_2\_B The maximum difference density is > 0.1\*ZMAX\*1.00

\_refine\_diff\_density\_max given = 11.090

Test value = 7.400

|                                                                      |                                        |
|----------------------------------------------------------------------|----------------------------------------|
| PLAT097_ALERT_2_B Large Reported Max. (Positive) Residual Density    | 11.09 eA-3                             |
| PLAT098_ALERT_2_B Large Reported Min. (Negative) Residual Density    | -8.74 eA-3                             |
| PLAT213_ALERT_2_B Atom O10                                           | has ADP max/min Ratio ..... 4.6 prolat |
| PLAT213_ALERT_2_B Atom O41                                           | has ADP max/min Ratio ..... 4.7 prolat |
| PLAT213_ALERT_2_B Atom O52                                           | has ADP max/min Ratio ..... 4.1 prolat |
| PLAT213_ALERT_2_B Atom O53                                           | has ADP max/min Ratio ..... 4.2 prolat |
| PLAT213_ALERT_2_B Atom O154                                          | has ADP max/min Ratio ..... 4.1 prolat |
| PLAT220_ALERT_2_B Large Non-Solvent O Ueq(max)/Ueq(min) Range        | 9.7 Ratio                              |
| PLAT234_ALERT_4_B Large Hirshfeld Difference W16 -- O47 ..           | 0.26 Ang.                              |
| PLAT234_ALERT_4_B Large Hirshfeld Difference W18 -- O55 ..           | 0.26 Ang.                              |
| PLAT241_ALERT_2_B High 'MainMol' Ueq as Compared to Neighbors of O55 | Check                                  |
| PLAT306_ALERT_2_B Isolated Oxygen Atom (H-atoms Missing ?) .....     | 0158 Check                             |
| PLAT306_ALERT_2_B Isolated Oxygen Atom (H-atoms Missing ?) .....     | 0159 Check                             |
| PLAT306_ALERT_2_B Isolated Oxygen Atom (H-atoms Missing ?) .....     | 0160 Check                             |
| PLAT306_ALERT_2_B Isolated Oxygen Atom (H-atoms Missing ?) .....     | 0161 Check                             |
| PLAT306_ALERT_2_B Isolated Oxygen Atom (H-atoms Missing ?) .....     | 0162 Check                             |
| PLAT306_ALERT_2_B Isolated Oxygen Atom (H-atoms Missing ?) .....     | 0163 Check                             |
| PLAT306_ALERT_2_B Isolated Oxygen Atom (H-atoms Missing ?) .....     | 0164 Check                             |
| PLAT306_ALERT_2_B Isolated Oxygen Atom (H-atoms Missing ?) .....     | 0165 Check                             |
| PLAT306_ALERT_2_B Isolated Oxygen Atom (H-atoms Missing ?) .....     | 0167 Check                             |
| PLAT306_ALERT_2_B Isolated Oxygen Atom (H-atoms Missing ?) .....     | 0168 Check                             |
| PLAT306_ALERT_2_B Isolated Oxygen Atom (H-atoms Missing ?) .....     | 0169 Check                             |
| PLAT306_ALERT_2_B Isolated Oxygen Atom (H-atoms Missing ?) .....     | 0170 Check                             |
| PLAT306_ALERT_2_B Isolated Oxygen Atom (H-atoms Missing ?) .....     | 0171 Check                             |
| PLAT306_ALERT_2_B Isolated Oxygen Atom (H-atoms Missing ?) .....     | 0172 Check                             |
| PLAT306_ALERT_2_B Isolated Oxygen Atom (H-atoms Missing ?) .....     | 0173 Check                             |
| PLAT306_ALERT_2_B Isolated Oxygen Atom (H-atoms Missing ?) .....     | 0174 Check                             |
| PLAT306_ALERT_2_B Isolated Oxygen Atom (H-atoms Missing ?) .....     | 0175 Check                             |
| PLAT306_ALERT_2_B Isolated Oxygen Atom (H-atoms Missing ?) .....     | 0176 Check                             |
| PLAT306_ALERT_2_B Isolated Oxygen Atom (H-atoms Missing ?) .....     | 0178 Check                             |
| PLAT306_ALERT_2_B Isolated Oxygen Atom (H-atoms Missing ?) .....     | 0179 Check                             |
| PLAT306_ALERT_2_B Isolated Oxygen Atom (H-atoms Missing ?) .....     | 0180 Check                             |
| PLAT306_ALERT_2_B Isolated Oxygen Atom (H-atoms Missing ?) .....     | 0181 Check                             |
| PLAT306_ALERT_2_B Isolated Oxygen Atom (H-atoms Missing ?) .....     | 0182 Check                             |
| PLAT306_ALERT_2_B Isolated Oxygen Atom (H-atoms Missing ?) .....     | 0183 Check                             |
| PLAT306_ALERT_2_B Isolated Oxygen Atom (H-atoms Missing ?) .....     | 0184 Check                             |
| PLAT306_ALERT_2_B Isolated Oxygen Atom (H-atoms Missing ?) .....     | 0185 Check                             |
| PLAT306_ALERT_2_B Isolated Oxygen Atom (H-atoms Missing ?) .....     | 0186 Check                             |
| PLAT306_ALERT_2_B Isolated Oxygen Atom (H-atoms Missing ?) .....     | 0187 Check                             |

|                   |                                          |       |      |       |
|-------------------|------------------------------------------|-------|------|-------|
| PLAT306_ALERT_2_B | Isolated Oxygen Atom (H-atoms Missing ?) | ..... | 0188 | Check |
| PLAT306_ALERT_2_B | Isolated Oxygen Atom (H-atoms Missing ?) | ..... | 0189 | Check |
| PLAT306_ALERT_2_B | Isolated Oxygen Atom (H-atoms Missing ?) | ..... | 0190 | Check |
| PLAT306_ALERT_2_B | Isolated Oxygen Atom (H-atoms Missing ?) | ..... | 0191 | Check |
| PLAT306_ALERT_2_B | Isolated Oxygen Atom (H-atoms Missing ?) | ..... | 0192 | Check |
| PLAT306_ALERT_2_B | Isolated Oxygen Atom (H-atoms Missing ?) | ..... | 0193 | Check |

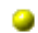

### Alert level C

ABSTY02\_ALERT\_1\_C An \_exptl\_absorpt\_correction\_type has been given without  
a literature citation. This should be contained in the  
\_exptl\_absorpt\_process\_details field.  
Absorption correction given as Multi-scan

DIFMN03\_ALERT\_1\_C The minimum difference density is < -0.1\*ZMAX\*0.75  
The relevant atom site should be identified.

DIFMX02\_ALERT\_1\_C The maximum difference density is > 0.1\*ZMAX\*0.75  
The relevant atom site should be identified.

|                   |                                                |                             |      |        |
|-------------------|------------------------------------------------|-----------------------------|------|--------|
| PLAT202_ALERT_3_C | Isotropic non-H Atoms in Anion/Solvent         | .....                       | 36   | Check  |
| PLAT213_ALERT_2_C | Atom W16                                       | has ADP max/min Ratio ..... | 3.8  | prolat |
| PLAT213_ALERT_2_C | Atom W17                                       | has ADP max/min Ratio ..... | 3.8  | prolat |
| PLAT213_ALERT_2_C | Atom W18                                       | has ADP max/min Ratio ..... | 3.6  | prolat |
| PLAT213_ALERT_2_C | Atom O15                                       | has ADP max/min Ratio ..... | 3.1  | prolat |
| PLAT213_ALERT_2_C | Atom O36                                       | has ADP max/min Ratio ..... | 3.5  | prolat |
| PLAT213_ALERT_2_C | Atom O45                                       | has ADP max/min Ratio ..... | 3.2  | prolat |
| PLAT213_ALERT_2_C | Atom O49                                       | has ADP max/min Ratio ..... | 3.5  | prolat |
| PLAT213_ALERT_2_C | Atom O56                                       | has ADP max/min Ratio ..... | 3.6  | prolat |
| PLAT213_ALERT_2_C | Atom O57                                       | has ADP max/min Ratio ..... | 3.2  | prolat |
| PLAT213_ALERT_2_C | Atom O66                                       | has ADP max/min Ratio ..... | 3.4  | prolat |
| PLAT213_ALERT_2_C | Atom O90                                       | has ADP max/min Ratio ..... | 3.6  | oblate |
| PLAT213_ALERT_2_C | Atom O127                                      | has ADP max/min Ratio ..... | 3.5  | oblate |
| PLAT220_ALERT_2_C | Large Non-Solvent W                            | Ueq(max)/Ueq(min) Range     | 4.8  | Ratio  |
| PLAT234_ALERT_4_C | Large Hirshfeld Difference W10                 | -- O46 ..                   | 0.16 | Ang.   |
| PLAT234_ALERT_4_C | Large Hirshfeld Difference W15                 | -- O45 ..                   | 0.18 | Ang.   |
| PLAT234_ALERT_4_C | Large Hirshfeld Difference W15                 | -- O46 ..                   | 0.18 | Ang.   |
| PLAT234_ALERT_4_C | Large Hirshfeld Difference In10                | -- O157 ..                  | 0.16 | Ang.   |
| PLAT241_ALERT_2_C | High 'MainMol' Ueq as Compared to Neighbors of |                             | 041  | Check  |
| PLAT241_ALERT_2_C | High 'MainMol' Ueq as Compared to Neighbors of |                             | 047  | Check  |
| PLAT241_ALERT_2_C | High 'MainMol' Ueq as Compared to Neighbors of |                             | 052  | Check  |
| PLAT242_ALERT_2_C | Low 'MainMol' Ueq as Compared to Neighbors of  |                             | 066  | Check  |
| PLAT250_ALERT_2_C | Large U3/U1 Ratio for Average U(i,j) Tensor    | ....                        | 2.2  | Note   |

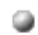

### Alert level G

|                   |                                                  |       |         |             |
|-------------------|--------------------------------------------------|-------|---------|-------------|
| PLAT003_ALERT_2_G | Number of Uiso or Uij Restrained non-H Atoms ... |       | 1       | Report      |
| PLAT004_ALERT_5_G | Polymeric Structure Found with Maximum Dimension |       | 1       | Info        |
| PLAT005_ALERT_5_G | No Embedded Refinement Details found in the CIF  |       |         | Please Do ! |
| PLAT045_ALERT_1_G | Calculated and Reported Z Differ by .....        |       | 0.50    | Ratio       |
| PLAT072_ALERT_2_G | SHELXL First Parameter in WGHT Unusually Large   |       | 0.11    | Report      |
| PLAT083_ALERT_2_G | SHELXL Second Parameter in WGHT Unusually Large  |       | 1091.54 | Why ?       |
| PLAT128_ALERT_4_G | Alternate Setting for Input Space Group P21/a    | P21/c |         | Note        |
| PLAT793_ALERT_4_G | The Model has Chirality at Si1 (Centro SPGR)     |       |         | R Verify    |
| PLAT793_ALERT_4_G | The Model has Chirality at Si2 (Centro SPGR)     |       |         | S Verify    |
| PLAT793_ALERT_4_G | The Model has Chirality at Si3 (Centro SPGR)     |       |         | R Verify    |
| PLAT793_ALERT_4_G | The Model has Chirality at Si4 (Centro SPGR)     |       |         | R Verify    |
| PLAT794_ALERT_5_G | Tentative Bond Valency for In5 (III) .....       |       | 3.02    | Note        |
| PLAT794_ALERT_5_G | Tentative Bond Valency for In6 (III) .....       |       | 3.03    | Note        |
| PLAT794_ALERT_5_G | Tentative Bond Valency for In7 (III) .....       |       | 2.80    | Note        |
| PLAT794_ALERT_5_G | Tentative Bond Valency for In8 (III) .....       |       | 2.94    | Note        |
| PLAT794_ALERT_5_G | Tentative Bond Valency for In9 (III) .....       |       | 2.92    | Note        |
| PLAT794_ALERT_5_G | Tentative Bond Valency for In10 (III) .....      |       | 2.96    | Note        |
| PLAT860_ALERT_3_G | Number of Least-Squares Restraints .....         |       | 6       | Note        |

---

7 **ALERT level A** = Most likely a serious problem - resolve or explain  
47 **ALERT level B** = A potentially serious problem, consider carefully  
26 **ALERT level C** = Check. Ensure it is not caused by an omission or oversight  
19 **ALERT level G** = General information/check it is not something unexpected

4 **ALERT type 1** CIF construction/syntax error, inconsistent or missing data  
73 **ALERT type 2** Indicator that the structure model may be wrong or deficient  
2 **ALERT type 3** Indicator that the structure quality may be low  
12 **ALERT type 4** Improvement, methodology, query or suggestion  
8 **ALERT type 5** Informative message, check

---

It is advisable to attempt to resolve as many as possible of the alerts in all categories. Often the minor alerts point to easily fixed oversights, errors and omissions in your CIF or refinement strategy, so attention to these fine details can be worthwhile. In order to resolve some of the more serious problems it may be necessary to carry out additional measurements or structure refinements. However, the purpose of your study may justify the reported deviations and the more serious of these should normally be commented upon in the discussion or experimental section of a paper or in the "special\_details" fields of the CIF. checkCIF was carefully designed to identify outliers and unusual parameters, but every test has its limitations and alerts that are not important in a particular case may appear. Conversely, the absence of alerts does not guarantee there are no aspects of the results needing attention. It is up to the individual to critically assess their own results and, if necessary, seek expert advice.

### **Publication of your CIF in IUCr journals**

A basic structural check has been run on your CIF. These basic checks will be run on all CIFs submitted for publication in IUCr journals (*Acta Crystallographica*, *Journal of Applied Crystallography*, *Journal of Synchrotron Radiation*); however, if you intend to submit to *Acta Crystallographica Section C* or *E* or *IUCrData*, you should make sure that full publication checks are run on the final version of your CIF prior to submission.

### **Publication of your CIF in other journals**

Please refer to the *Notes for Authors* of the relevant journal for any special instructions relating to CIF submission.

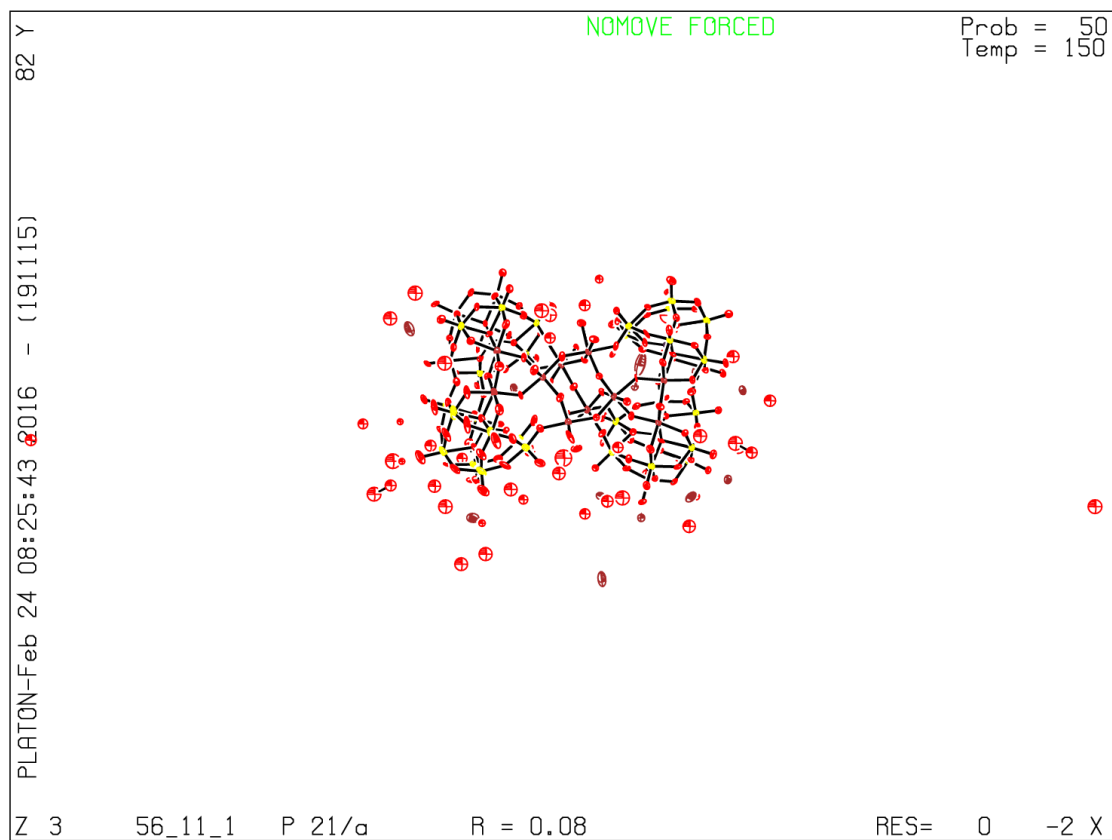

Supplement: s1 [file s1]
