# Supplementary material
Source: MDPI journal article supplement (https://www.mdpi.com/2304-6740/4/2/16)
Supplement: s1 [file s1]

# Supplementary Materials: Synthesis, Structure, and Characterization of In<sub>10</sub>-Containing Open-Dawson Polyoxometalate

Satoshi Matsunaga, Takuya Otaki, Yusuke Inoue, Kohei Mihara, and Kenji Nomiya<sup>1</sup>. Heading

**Table S1.** Bond valence sum (BVS) calculations of In and O atoms of the Indium-cluster moieties of In<sub>10</sub>-open.

|        |       |        |       |        |       |
|--------|-------|--------|-------|--------|-------|
| In(1)  | 2.905 | O(133) | 0.995 | O(146) | 1.057 |
| In(2)  | 2.992 | O(134) | 1.005 | O(147) | 1.107 |
| In(3)  | 2.885 | O(135) | 1.050 | O(148) | 1.091 |
| In(4)  | 2.903 | O(136) | 1.046 | O(149) | 1.039 |
| In(5)  | 3.012 | O(137) | 1.043 | O(150) | 0.410 |
| In(6)  | 3.029 | O(138) | 0.932 | O(151) | 0.381 |
| In(7)  | 2.804 | O(139) | 1.059 | O(152) | 0.387 |
| In(8)  | 2.944 | O(140) | 1.061 | O(153) | 0.368 |
| In(9)  | 2.922 | O(141) | 1.121 | O(154) | 0.285 |
| In(10) | 2.960 | O(142) | 1.104 | O(155) | 0.358 |
|        |       | O(143) | 1.116 | O(156) | 0.399 |
|        |       | O(144) | 1.080 | O(157) | 0.337 |
|        |       | O(145) | 1.098 |        |       |

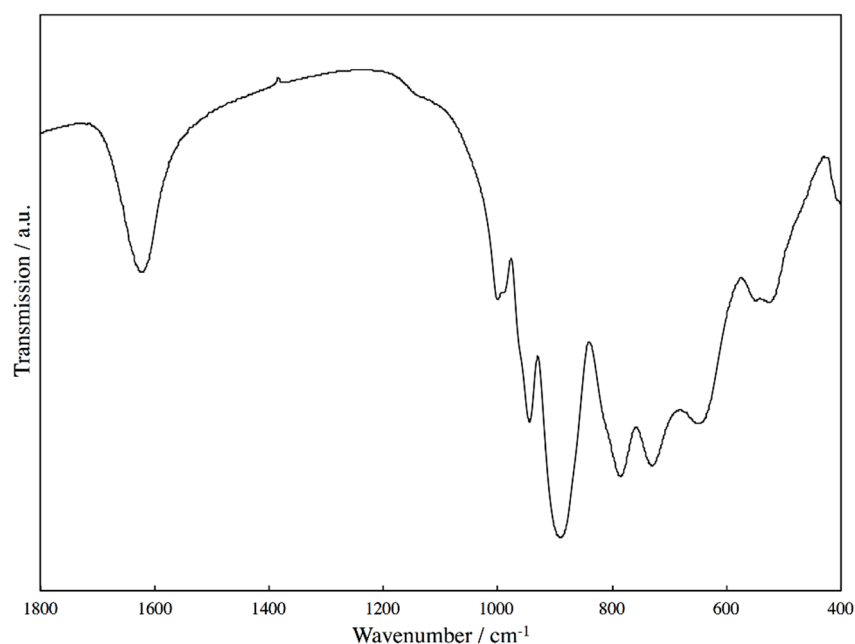

**Figure S1.** FT-IR spectrum of potassium salt of In<sub>10</sub>-open (KBr disk).

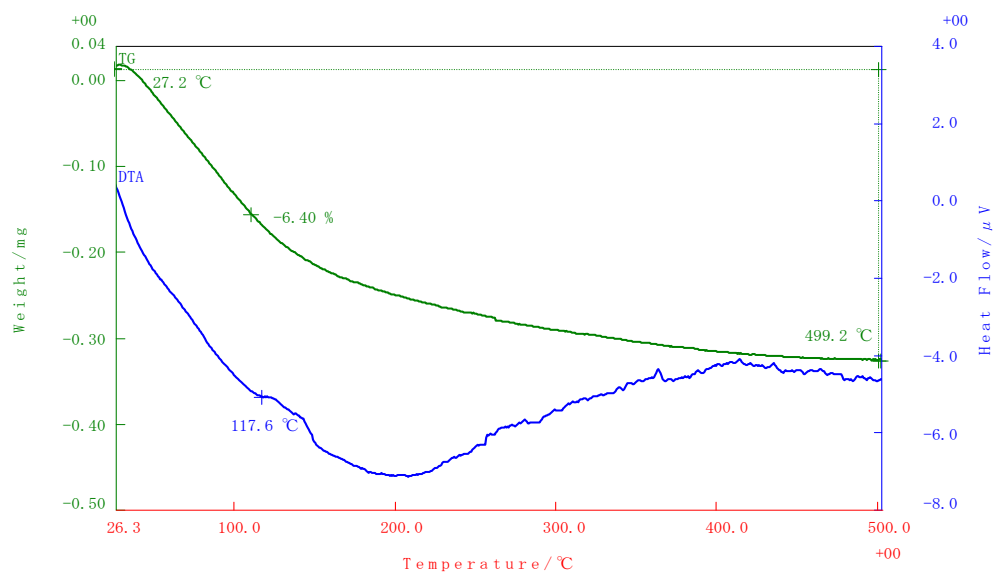

**Figure S2.** TG/DTA data of potassium salt of **In**<sub>10</sub>-open (from 26.3 to 500 °C).
